# Supplementary material for: Deciphering global signal features of high-throughput array data from cancers
Source: Royal Society of Chemistry journal article supplement (doi:10.1039/c4mb00084f), 2014-03-24
Supplement: c4mb00084f1.pdf [file c4mb00084f1.pdf]

**Supplementary Tables:**

**Supplementary Table 1 Comparison of the median raw signal intensities of gene expression in cancer samples and normal samples.**

| Dataset      | GSE ID   | Median of Cancer | Median of Normal | P value  |
|--------------|----------|------------------|------------------|----------|
| Breast22     | GSE10780 | 5.86             | 5.55             | 0.062    |
| Breast24     | GSE16873 | 5.88             | 5.85             | 0.94     |
| Colon34      | GSE18105 | 5.98             | 5.53             | 6.46E-04 |
| Colon64      | GSE8671  | 5.32             | 5.39             | 0.20     |
| Esophagus24  | GSE29001 | 7.06             | 6.96             | 0.27     |
| Esophagus34  | GSE20347 | 6.45             | 6.08             | 0.092    |
| Esophagus106 | GSE23400 | 7.24             | 6.90             | 1.43E-04 |
| Gastric24    | GSE19826 | 4.51             | 4.42             | 0.81     |
| Gastric62    | GSE13911 | 5.25             | 4.95             | 0.048    |
| Hnc44        | GSE6631  | 5.66             | 5.51             | 0.063    |
| Liver20      | GSE29721 | 4.40             | 3.57             | 1.51E-03 |
| Lung54       | GSE7670  | 6.05             | 6.27             | 0.44     |
| Lung60       | GSE31552 | 6.68             | 6.57             | 0.62     |
| Lung66       | GSE10072 | 7.78             | 7.35             | 0.80     |
| Lung88       | GSE18842 | 4.42             | 4.35             | 0.057    |
| Otscc24      | GSE9844  | 4.10             | 3.97             | 0.30     |
| Otscc40      | GSE13601 | 6.43             | 6.01             | 9.98E-03 |
| Pancreatic30 | GSE16515 | 5.13             | 4.91             | 0.024    |
| Pancreatic78 | GSE15471 | 5.75             | 5.52             | 7.30E-04 |
| Pancreatic90 | GSE28735 | 4.54             | 4.18             | 4.27E-03 |
| Prostate116  | GSE6919  | 4.75             | 4.70             | 0.60     |
| Ptc40        | GSE29265 | 4.63             | 4.58             | 0.88     |
| Renal20      | GSE6344  | 6.20             | 6.20             | 0.65     |

Note: Median of Cancer represents the median of the raw signal intensities in the cancer samples. Median of Normal represents the median of the raw signal intensities in the normal samples. P value: the P value of the medians between cancer samples and normal samples, according to the Wilcoxon rank-sum test.

## Supplementary Figures:

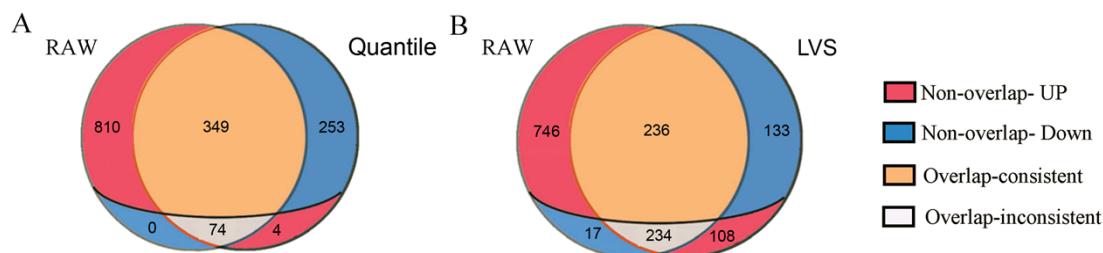

**Supplementary Figure 1 Normalization may change the expression directions of differentially expressed miRNAs in the miRNA Colon168 dataset.** Overlap-consistent represents the set of miRNAs showing differential expression before and after normalization with the same expression direction. Overlap-inconsistent represents the set of miRNAs showing differential expression before and after normalizations with inconsistent expression directions. Non-overlap-up represents the up-regulated miRNAs that were selected as differentially expressed only before or only after normalization. Non-overlap-down represents the down-regulated miRNAs that were selected only before or only after normalization.

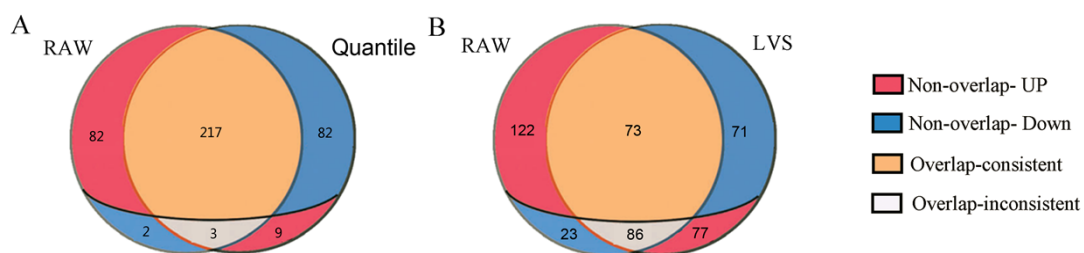

**Supplementary Figure 2 Normalization may change the expression directions of differentially expressed miRNAs in the Esophagus206 dataset.** Overlap-consistent represents the set of miRNAs showing differential expression before and after normalization with the same expression direction. Overlap-inconsistent represents the set of miRNAs showing differential expression before and after normalization, but with inconsistent expression directions. Non-overlap-up represents the up-regulated miRNAs that were selected as differentially expressed only before or only after normalization. Non-overlap-down represents the down-regulated miRNAs that were selected only before or only after normalization.

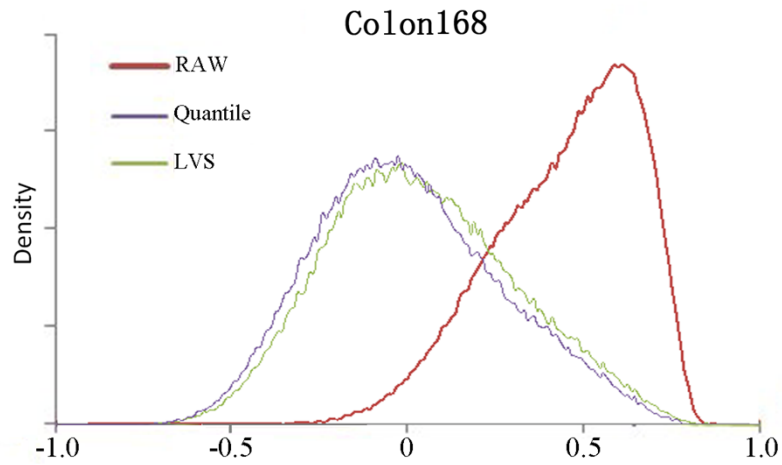

**Supplementary Figure 3** The density distribution of the pair-wise Pearson correlation coefficients before and after normalizations for the miRNA Colon168 dataset.

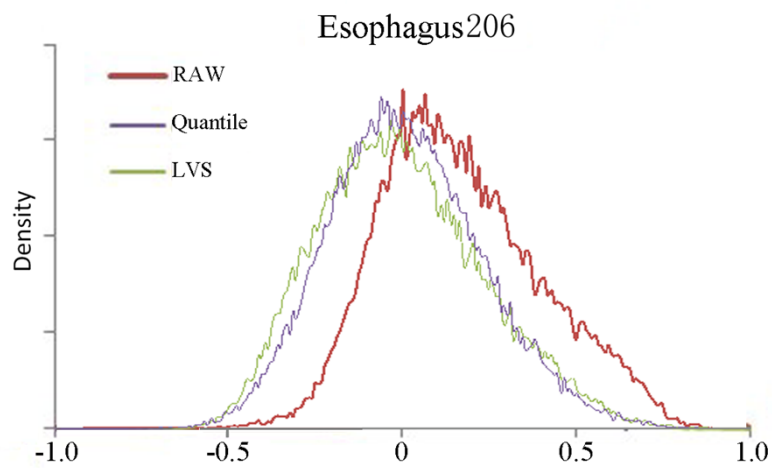

**Supplementary Figure 4** The density distribution of the pair-wise Pearson correlation coefficients before and after normalizations for the miRNA Esophagus206 dataset.
